# Supplementary material for: History vs. legend: Retracing invasion and spread of Oxalis pes-caprae L. in Europe and the Mediterranean area
Source: PubMed Central journal article supplement (PMC5747460; doi:10.1371/journal.pone.0190237), 2017-12-29

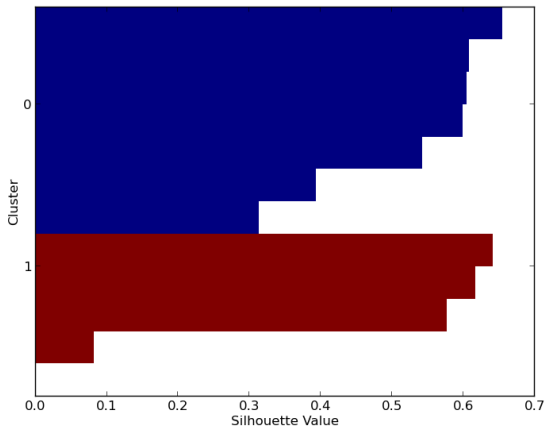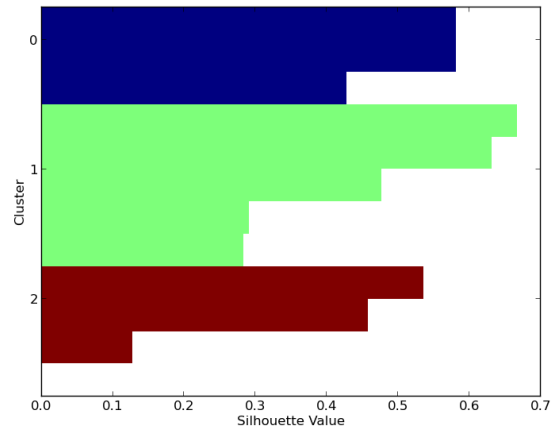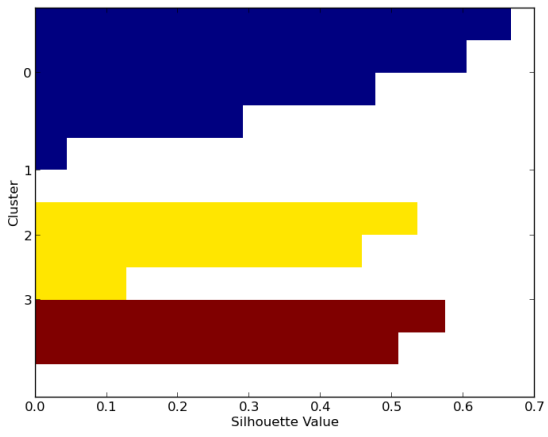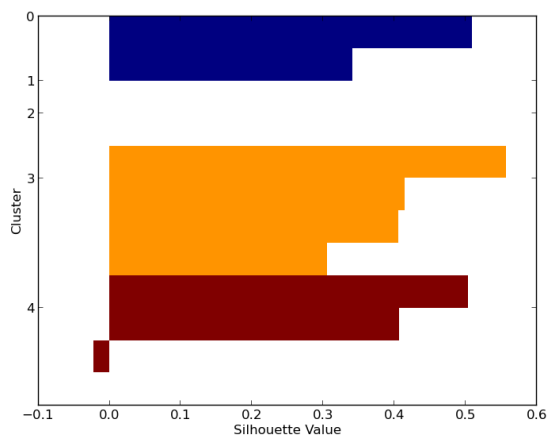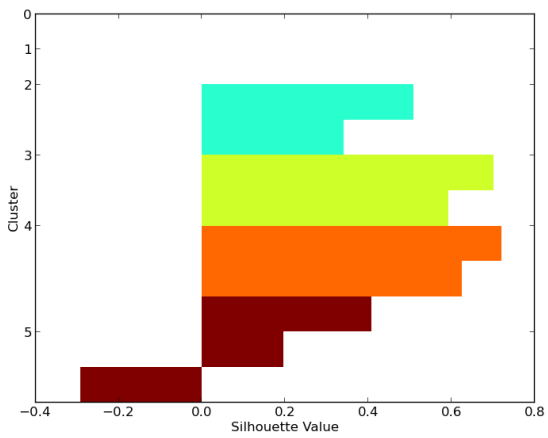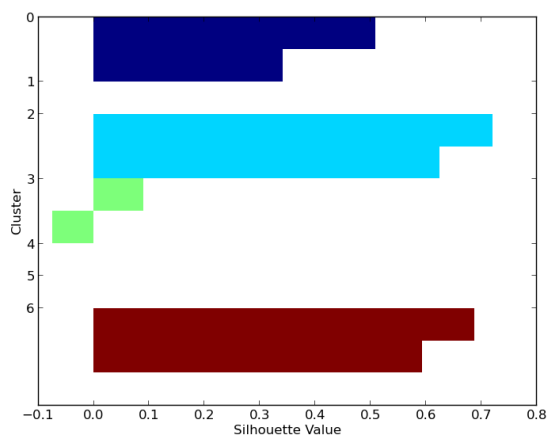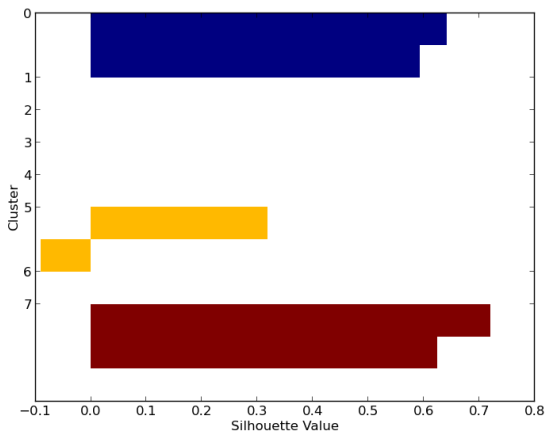

Supplement: pone.0190237.s005.pdf [file pone.0190237.s005.pdf]
